# Supplementary material for: Prolonged inhibition of hepatocellular carcinoma cell proliferation by combinatorial expression of defined transcription factors
Source: PubMed Central journal article supplement — Cancer Sci. 2018 Oct 15;109(11):3543–53. doi: 10.1111/cas.13798 (PMC6215883; doi:10.1111/cas.13798), 2018-10-15
Supplement: CAS-109-3543-s002.pdf [file CAS-109-3543-s002.pdf]

# Figure S2

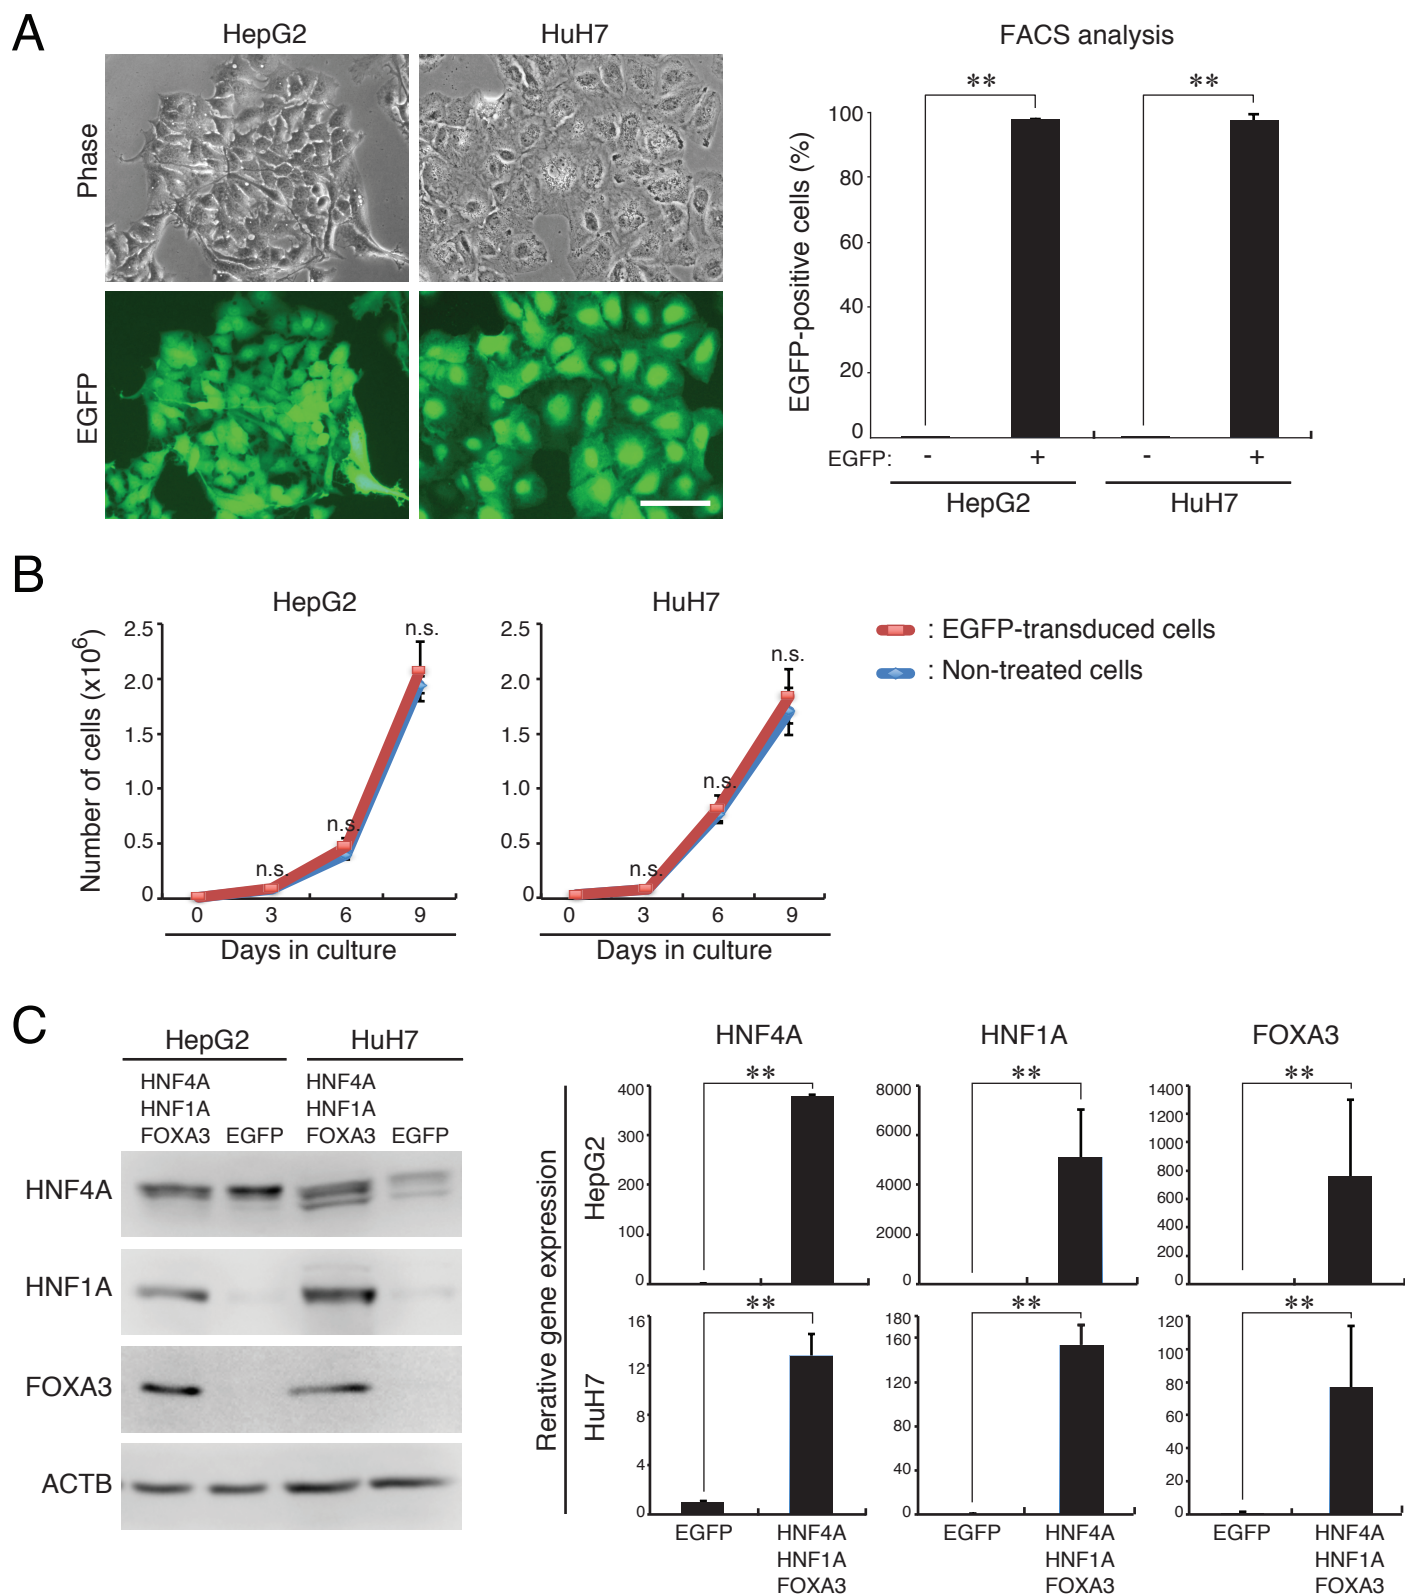

**Figure S2.** Detailed analysis for HCC cell lines after retroviral transduction. (A) Retroviral transduction efficiency of HepG2 and HuH7 cells was evaluated using a fluorescence microscopy (left panels) and FACS (right bar plots) at day 3 after infection with a retrovirus expressing EGFP. Scale bar: 100  $\mu$ m. Data represent means  $\pm$  SD ( $n = 3$ ).  $**P < 0.01$ . (B) The number of cells in cultures of HepG2 and HuH7 cells with or without transduction of EGFP were counted. Data represent means  $\pm$  SD ( $n = 3$ ). n.s.: not significant. (C) Western blot analyses (left panels) and RT-qPCR analyses (right bar plots) were conducted for HepG2 and HuH7 cells at day 7 after transduction of the three TFs (HNF4A, HNF1A, and FOXA3) or EGFP. ACTB was used for normalization in western blot analyses. All data obtained from RT-qPCR analyses were normalized by the values for EGFP-expressing HepG2 or HuH7 cells and the fold differences are shown. Data represent means  $\pm$  SD ( $n = 3$ ).  $**P < 0.01$ .
