# Supplementary material for: Prolonged inhibition of hepatocellular carcinoma cell proliferation by combinatorial expression of defined transcription factors
Source: PubMed Central journal article supplement — Cancer Sci. 2018 Oct 15;109(11):3543–53. doi: 10.1111/cas.13798 (PMC6215883; doi:10.1111/cas.13798), 2018-10-15
Supplement: CAS-109-3543-s003.pdf [file CAS-109-3543-s003.pdf]

# Figure S3

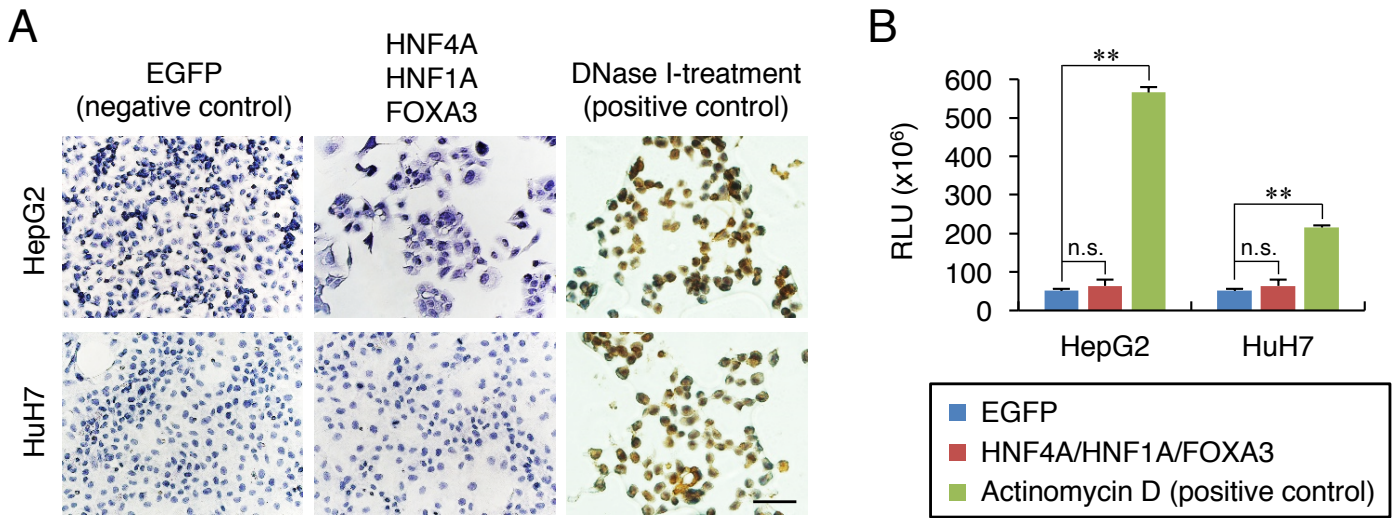

**Figure S3.** Decreases in cell growth of HCC cells after combinatorial transduction of the three TFs (HNF4A, HNF1A, and FOXA3) is not caused by apoptosis. (A) TUNEL staining of HepG2 (upper panels) and HuH7 (lower panels) cells. The cells were counterstained with hematoxylin. Scale bar: 100  $\mu\text{m}$ . (B) Caspase-Glo-3/7 assays in HepG2 and HuH7 cells. RLU: relative luminescence units. Data represent means  $\pm$  SD ( $n = 3$ ). \*\* $P < 0.01$ . n.s., not significant.
